# Supplementary material
Source: PubMed Central journal article supplement (PMC4636978)

### Supplemental Methods

#### Stimuli for IATs

*Gender IAT:* Male names ('Ben', 'John', 'Daniel', 'Paul', 'Jeffrey', 'Michael') and female names ('Julia', 'Michelle', 'Anna', 'Emily', 'Rebecca', 'Lisa') were paired with family words ('Home', 'Parents', 'Children', 'Family', 'Marriage', 'Wedding') and career words ('Management', 'Corporation', 'Salary', 'Office', 'Business', 'Career').

*Race Evaluation IAT:* Greyscale photographs of 6 African American (3 male, 3 female) and 6 Caucasian (3 male, 3 female) faces with neutral facial expressions were paired with positive words ('Joy', 'Love', 'Wonderful', 'Pleasure', 'Glorious', 'Happy') and negative words ('Agony', 'Terrible', 'Horrible', 'Nasty', 'Evil', and 'Awful').

*Race Stereotype IAT:* The same images from the Race Evaluation IAT were paired with words depicting intelligence (intellectual words: 'Math', 'Brainy', 'Educated', 'Scientist', 'College', 'Genius') and athleticism (Athletic words: 'Athletic', 'Boxing', 'Basketball', 'Run', 'Jump', 'Football').

*Shoe IAT:* Grayscale photographs of 6 Dress shoes and 6 Sneakers were paired with words depicting business ('Merger', 'Portfolio', 'Desk', 'C.E.O.', 'Investor', 'Cubicle) and sports ('Game', 'Ball', 'Score', 'Championship', 'Running', 'Exercise').

*Flower IAT:* Positive words and negative words (as above) were paired with Flowers ('Daisy', 'Rose', 'Tulip', 'Daffodil', 'Lilac', 'Lily') and insects ('Roach', 'Ant', 'Spider', 'Fly', 'Termite', 'Wasp').

### Supplemental Results

#### Null Hypothesis Statistical Testing (NHST) (IAT tests)

Group x Social Content: To enable comparison with previous work using NHST, we submitted the data to a mixed 2 (Group: ASD, CT) by 2 (Social vs. Nonsocial IAT) repeated-measures ANOVA. The ANOVA revealed a significant main effect of Group,  $F(1, 60) = 16.30, p < .001, \eta^2 = 0.21$ , indicating that the ASD group showed an overall lower IAT effect than controls. In addition, a main effect of Social Content,  $F(1, 60)=64.88, p<.001, \eta^2 = 0.52$ , reflected that IAT effects were overall larger for the Nonsocial tests (Flowers, Shoes) than for the Social tests (Race Eval, Race Stereo, Gender Stereo). However, there was no Diagnosis x Social Content interaction,  $F(1, 60) = 2.84, p=.10, \eta^2 = 0.05$ , suggesting that the effect of group did not differ as a function of social content.

#### Standard Deviation: Regression Analysis

To investigate whether differences in RT variability could account for our pattern of results, we regressed *mean overall SD* ( $x$ ) (for each Condition and Subject) against *IAT D* ( $y$ ), for all participants (ASD and CTLs). The residuals from this regression were then used to compute group differences in IAT effects (i.e. with standard deviation regressed out). This analysis revealed the same pattern of results as before: the effect size estimate for the group difference was again large for nonsocial IATs ( $d=1.03, 95\% \text{ CI } [.57, 1.57]$ ), and medium for social IATs ( $d=.59, 95\% \text{ CI } [.07, 1.17]$ ), with 95% CIs in each case excluding zero. Again, the between-groups effect sizes for social and nonsocial IATs did not differ from each other (overlapping 95% CIs).

#### RT: Regression Analysis

Similar regressions were run to rule out the possibility that slower responding in ASD could account for their slightly weaker IAT effects relative to CTL.

(1) *Mean overall RT regressed out:* This analysis revealed the same pattern of results as the main analysis: the effect size estimate for the group difference was again large for nonsocial IATs ( $d=1.05$ , 95% CI [.58, 1.60]), and medium for social IATs ( $d=.59$ , 95% CI [.09, 1.17]), with 95% CIs in each case excluding zero.

(2) *Mean congruent RT regressed out:* This analysis revealed the same overall pattern of results as before but with weaker between-groups effect sizes: the effect size estimate for the group difference was medium for nonsocial IATs ( $d=.70$ , 95% CI [.20, 1.24]), and small for social IATs ( $d=.23$ , 95% CI [-.29, .76]), with 95% CIs in the latter case failing to exclude zero.

(3) *Mean incongruent RT regressed out:* This analysis revealed the same pattern of results as the main analysis with even stronger between-group differences: the effect size estimate for the group difference was large for nonsocial IATs ( $d=1.12$ , 95% CI [.66, 1.65]), and medium/large for social IATs ( $d=.76$ , 95% CI [.25, 1.41]), with 95% CIs in each case excluding zero.

Supplemental Table 1. First-run analysis of IAT effects (analyzing the first nonsocial and nonsocial IATs administered). IAT D effects (means and bootstrapped 95% CIs), and between groups effect sizes (Cohen's d) in bold.

|                              | All trials              |                | First-run               |                |
|------------------------------|-------------------------|----------------|-------------------------|----------------|
|                              | ASD                     | CTL            | ASD                     | CTL            |
| nonSocial                    | .53 [.40, .63]          | .79 [.72, .85] | .50 [.40, .62]          | .83 [.74, .91] |
| Social                       | .29 [.19, .39]          | .42 [.35, .48] | .40 [.21, .57]          | .53 [.44, .63] |
| <b>ASDvsCTL_Nonsocial_ES</b> | <b>1.03 [.57, 1.58]</b> |                | <b>1.18 [.66, 1.86]</b> |                |
| <b>ASDvsCTL_Social_ES:</b>   | <b>.56 [.05, 1.14]</b>  |                | <b>.35 [-.17, .89]</b>  |                |

Supplemental Table 2. IAT sequence of blocks (example for a Flower-Insects IAT with congruent condition first, incongruent condition second)

| Block | No. of Trials | Function | Items assigned to left-key response | Items assigned to right-key response |
|-------|---------------|----------|-------------------------------------|--------------------------------------|
| 1     | 20            | Practice | Flowers                             | Insects                              |
| 2     | 20            | Practice | Pleasant words                      | Unpleasant words                     |
| 3     | 20            | Practice | Flowers + Pleasant words            | Insects + Unpleasant words           |
| 4     | 40            | Test     | Flowers + Pleasant words            | Insects + Unpleasant words           |
| 5     | 40            | Practice | Insects                             | Flowers                              |
| 6     | 20            | Practice | Insects + Pleasant words            | Flowers + Unpleasant words           |
| 7     | 40            | Test     | Insects + Pleasant words            | Flowers + Unpleasant words           |

**Supplemental Table 3.** IAT effects and their correlations with AQ/BAPQ scores for the MTurk (online) sample. Data presented for Whole Sample, White participants only, male participants only, and female participants only. Values represent mean D effects and Pearson r correlations (italicized) with AQ and BAPQ scores. Brackets contain bootstrapped 95% confidence intervals.

|                 | Whole Sample<br>(N=342)              | White only<br>(n=287)                 | Male only<br>(n=183)                | Female only<br>(n=159)              |
|-----------------|--------------------------------------|---------------------------------------|-------------------------------------|-------------------------------------|
| Flowers/Insects | D = .76<br>[.71, .81]                | D = .76<br>[.70, .81]                 | D = .66<br>[.58, .73]               | D = .85<br>[.78, .91]               |
| <i>AQ</i>       | <i>r(340) = -.12</i><br>[-.28, .04]  | <i>r(285) = -.14</i><br>[-.30, .04]   | <i>r(181) = -.14</i><br>[-.37, .11] | <i>r(157) = -.07</i><br>[-.26, .15] |
| <i>BAPQ</i>     | <i>r(340) = -.19</i><br>[-.34, -.03] | <i>r(285) = -.18</i><br>[-.34, -.002] | <i>r(181) = -.17</i><br>[-.41, .10] | <i>r(157) = -.16</i><br>[-.36, .06] |
| Shoes           | D = .76<br>[.71, .80]                | D = .76<br>[.71, .80]                 | D = .78<br>[.72, .83]               | D = .73<br>[.66, .81]               |
| <i>AQ</i>       | <i>r(340) = .01</i><br>[-.14, .14]   | <i>r(285) = .03</i><br>[-.13, .17]    | <i>r(181) = .003</i><br>[-.20, .18] | <i>r(157) = -.01</i><br>[-.21, .18] |
| <i>BAPQ</i>     | <i>r(340) = .05</i><br>[-.10, .18]   | <i>r(285) = .02</i><br>[-.14, .17]    | <i>r(181) = .04</i><br>[-.16, .22]  | <i>r(157) = .03</i><br>[-.16, .22]  |
| Race Eval       | D = .44<br>[.38, .50]                | D = .47<br>[.40, .53]                 | D = .49<br>[.39, .57]               | D = .41<br>[.33, .48]               |
| <i>AQ</i>       | <i>r(340) = .04</i><br>[-.15, .21]   | <i>r(285) = -.001</i><br>[-.21, .20]  | <i>r(181) = .10</i><br>[-.23, .36]  | <i>r(157) = -.03</i><br>[-.25, .19] |
| <i>BAPQ</i>     | <i>r(340) = -.02</i><br>[-.18, .15]  | <i>r(285) = -.01</i><br>[-.21, .18]   | <i>r(181) = .08</i><br>[-.19, .36]  | <i>r(157) = -.12</i><br>[-.32, .09] |
| Race Ster       | D = .32<br>[.27, .38]                | D = .32<br>[.27, .38]                 | D = .36<br>[.29, .42]               | D = .27<br>[.19, .35]               |
| <i>AQ</i>       | <i>r(340) = .03</i><br>[-.11, .18]   | <i>r(285) = .03</i><br>[-.14, .18]    | <i>r(181) = -.07</i><br>[-.25, .11] | <i>r(157) = .17</i><br>[-.09, .40]  |
| <i>BAPQ</i>     | <i>r(340) = .13</i><br>[-.01, .26]   | <i>r(285) = .11</i><br>[-.04, .25]    | <i>r(181) = .03</i><br>[-.15, .20]  | <i>r(157) = .25</i><br>[-.001, .43] |
| Gender          | D = .37<br>[.32, .41]                | D = .37<br>[.32, .41]                 | D = .35<br>[.29, .41]               | D = .39<br>[.31, .46]               |
| <i>AQ</i>       | <i>r(340) = .10</i><br>[-.05, .23]   | <i>r(285) = .09</i><br>[-.07, .24]    | <i>r(181) = .17</i><br>[-.02, .34]  | <i>r(157) = -.01</i><br>[-.28, .21] |
| <i>BAPQ</i>     | <i>r(340) = .08</i><br>[-.05, .22]   | <i>r(285) = .06</i><br>[-.08, .21]    | <i>r(181) = .16</i><br>[-.03, .34]  | <i>r(157) = -.02</i><br>[-.21, .15] |

Supplemental Table 4. Demographic information (values represent means  $\pm$  standard deviations) for participant groups from a previous pilot study. Pilot ASD: participants with a diagnosis of ASD tested in the laboratory. Pilot CTL: controls tested in the laboratory.

|                            | Pilot ASD<br>(n=8) | Pilot CTL<br>(n=27) |
|----------------------------|--------------------|---------------------|
| Age (yrs)                  | 29.88 $\pm$ 10.89  | 32.96 $\pm$ 9.20    |
| FSIQ                       | 106.75 $\pm$ 6.20  | 113.33 $\pm$ 8.70   |
| PIQ                        | 97.88 $\pm$ 8.59   | 110.81 $\pm$ 10.51  |
| VIQ                        | 117.38 $\pm$ 12.29 | 112.67 $\pm$ 8.42   |
| ADOS A<br>(Cut-off 3/2)    | 4.13 $\pm$ 1.73    | --                  |
| ADOS B<br>(Cut-off 6/4)    | 7.63 $\pm$ 3.20    | --                  |
| ADOS A+B<br>(Cut-off 10/7) | 11.75 $\pm$ 4.74   | --                  |

Supplemental Table 5. IAT D effects for the combined samples (pilot participants plus participants from main study), for the three IAT tests that were common to both studies. One CTL participant from the pilot study did not complete the Race Evaluative IAT. Values are means and [bootstrapped 95% CIs].

|                  | ASD combined (n=35)      | CTL combined (n=65)      |
|------------------|--------------------------|--------------------------|
| Flow/Ins IAT     | 0.53 [0.43, 0.63]        | 0.76 [0.67, 0.83]        |
| Race Eval IAT    | 0.35 [0.20, 0.49]        | 0.47 [0.38, 0.56]        |
| Gender IAT       | 0.27 [0.16, 0.40]        | 0.41 [0.34, 0.48]        |
| <b>nonSocial</b> | <b>0.53 [0.43, 0.63]</b> | <b>0.76 [0.67, 0.83]</b> |
| <b>Social</b>    | <b>0.31 [0.21, 0.42]</b> | <b>0.44 [0.38, 0.50]</b> |

**Supplemental Table 6:** Explicit scale data (means  $\pm$  standard deviations) for the online (MTurk sample). MRS = Modern Racism Scale; IMS = Internal motivation to respond without prejudice; EMS = External motivation to respond without prejudice; Race Semantic = semantic differential scores for Black/White+Good/Bad; Flo/Ins Semantic = semantic differential scores for Flowers/Insects+Good/Bad; Shoe Semantic = semantic differential scores for Dress Shoes/Sneakers+Sports/Business; MSS = Modern Sexism Scale; Gender/Occupation = reported associations between Male/Female+Career/Family Occupation; Race/Occupation = reported associations between Black/White+Mental/Physical Occupation (Race Occ.)

| Scale             | Stereotype Group |                  | Evaluative Group |                  |
|-------------------|------------------|------------------|------------------|------------------|
|                   | Count            | Mean $\pm$ SD    | Count            | Mean $\pm$ SD    |
| MRS               | 178              | 12.65 $\pm$ 5.05 | 164              | 13.04 $\pm$ 5.47 |
| IMS               | 178              | 7.03 $\pm$ 2.09  | 164              | 7.19 $\pm$ 1.94  |
| EMS               | 178              | 4.02 $\pm$ 2.21  | 164              | 4.01 $\pm$ 2.13  |
| Race Semantic     | 178              | 1.28 $\pm$ 5.23  | 164              | .63 $\pm$ 4.93   |
| Flo/Ins Semantic  | --               | --               | 164              | 14.12 $\pm$ 6.88 |
| Shoe Semantic     | 178              | 3.79 $\pm$ .69   | --               | --               |
| MSS               | 178              | 21.43 $\pm$ 5.01 | --               | --               |
| Gender/Occupation | 178              | 3.41 $\pm$ .40   | --               | --               |
| Race/Occupation   | 165              | 3.55 $\pm$ .50   | --               | --               |



**Supplemental Table 7: Correlations (Pearson  $r$ 's) between ADOS scores and raw RT differences (incongruent minus congruent blocks) on the IAT, for the ASD group (n=27-35 depending on task). Each cell contains Pearson  $r$  and bootstrapped 95% CI. Raw Scores (A+B) = sum of raw scores on the Communication (A) and Social (B) subscales of the ADOS; Old Algorithm A+B = scores from Communication (A) + Social (B) scoring algorithm; New Algorithm (SA) = scores from Social Affect algorithm on revised ADOS; and New Algorithm Severity Score (SA) = calibrated Social Affect severity score (scores standardized from 1-10) for the ADOS.**

| <b>ADOS</b>                                          | <b>Flo/Ins<br/>Evaluative</b> | <b>Shoe<br/>Stereotype</b>  | <b>Race<br/>Evaluative</b>  | <b>Race<br/>Stereotype</b> | <b>Gender<br/>Stereotype</b> |
|------------------------------------------------------|-------------------------------|-----------------------------|-----------------------------|----------------------------|------------------------------|
| <b>Raw Scores<br/>(A+B)</b>                          | r(29) = .15<br>[-.21, .49]    | r(23) = -.15<br>[-.48, .39] | r(29) = -.22<br>[-.59, .46] | r(25) = .07<br>[-.37, .61] | r(28) = .10<br>[-.29, .39]   |
| <b>Old Algorithm<br/>(A+B)</b>                       | r(33) = .12<br>[-.22, .45]    | r(25) = -.20<br>[-.51, .32] | r(33) = -.20<br>[-.56, .44] | r(27) = .07<br>[-.37, .56] | r(32) = .04<br>[-.27, .30]   |
| <b>New<br/>Algorithm<br/>(SA)</b>                    | r(29) = .10<br>[-.27, .45]    | r(23) = -.21<br>[-.55, .37] | r(29) = -.21<br>[-.59, .47] | r(25) = .08<br>[-.39, .60] | r(28) = .04<br>[-.36, .35]   |
| <b>New<br/>Algorithm<br/>Severity Score<br/>(SA)</b> | r(29) = .03<br>[-.34, .40]    | r(23) = -.20<br>[-.59, .41] | r(29) = -.32<br>[-.64, .23] | r(25) = .00<br>[-.44, .41] | r(28) = .01<br>[-.36, .33]   |

**Supplemental Table 8.** Internal Consistency Analysis. Correlations between IAT D on practice and test blocks of the IAT.

|               | ASD                | CTL                |
|---------------|--------------------|--------------------|
| Flo/ins       | 0.46 [-0.07, 0.68] | 0.22 [-0.09, 0.48] |
| Shoe Stereo   | 0.51 [-0.13, 0.80] | 0.32 [-0.01, 0.53] |
| Race Eval     | 0.61 [0.25, 0.77]  | 0.47 [0.16, 0.67]  |
| Race Stereo   | 0.51 [0.17, 0.74]  | 0.13 [-0.23, 0.48] |
| Gender Stereo | 0.27 [-0.09, 0.56] | 0.19 [-0.16, 0.50] |

**Supplemental Figure 1.** Task orders for the various participant groups. In the laboratory, participants (ASD and matched controls) completed either the Eval 1<sup>st</sup> Order or the Stereo 1<sup>st</sup> Order (randomly assigned). Online participants were restricted to completing only one of either the Eval or Stereo experiments exclusively. Temporal order proceeds from top to bottom; the order of measures contained within a single box was randomized.

| In laboratory participants (ASD/Control)                                                                                            |                                                                             | Online participants (Mturk)                                                 |                                                                                                                                     |
|-------------------------------------------------------------------------------------------------------------------------------------|-----------------------------------------------------------------------------|-----------------------------------------------------------------------------|-------------------------------------------------------------------------------------------------------------------------------------|
| Eval 1 <sup>st</sup> Order                                                                                                          | Stereo 1 <sup>st</sup> Order                                                | Eval Order                                                                  | Stereo Order                                                                                                                        |
| Background                                                                                                                          | Background                                                                  | Background                                                                  | Background                                                                                                                          |
| RaceEval IAT,<br>FloInsEval IAT, AQ,<br>BAPQ                                                                                        | RaceStereo IAT,<br>GenderStereo IAT,<br>ShoeStereo IAT, AQ,<br>BAPQ         | RaceEval IAT,<br>FloInsEval IAT, AQ,<br>BAPQ                                | RaceStereo IAT,<br>GenderStereo IAT,<br>ShoeStereo IAT, AQ,<br>BAPQ                                                                 |
| Semantic Scales<br>(Flowers, Insects)                                                                                               | Semantic Scales<br>(Shoe, Gender<br>Occupation, Race<br>Occupation), MSS    | MRS,IMS/EMS, Race<br>Contact Measures,<br>Semantic Scales<br>(Black, White) | MRS,IMS/EMS, Race<br>Contact Measures,<br>MSS, Semantic Scales<br>(Shoe, Gender<br>Occupation, Race<br>Occupation, White,<br>Black) |
| Break (median=89.6 minutes, min=38 minutes)                                                                                         |                                                                             |                                                                             |                                                                                                                                     |
| ShoeStereo IAT,<br>RaceStereo IAT,<br>GenderStereo IAT                                                                              | FloInsEval IAT,<br>RaceEval IAT                                             |                                                                             |                                                                                                                                     |
| MRS,IMS/EMS, MSS,<br>Race Contact<br>Measures, Semantic<br>Scales (Black, White,<br>Gender Occupation,<br>Race Occupation,<br>Shoe) | MRS,IMS/EMS, Race<br>Contact Measures,<br>Semantic Scales<br>(Black, White) |                                                                             |                                                                                                                                     |

Supplemental Figure 2: Means and individual (participant-level) IAT effects for each participant group.

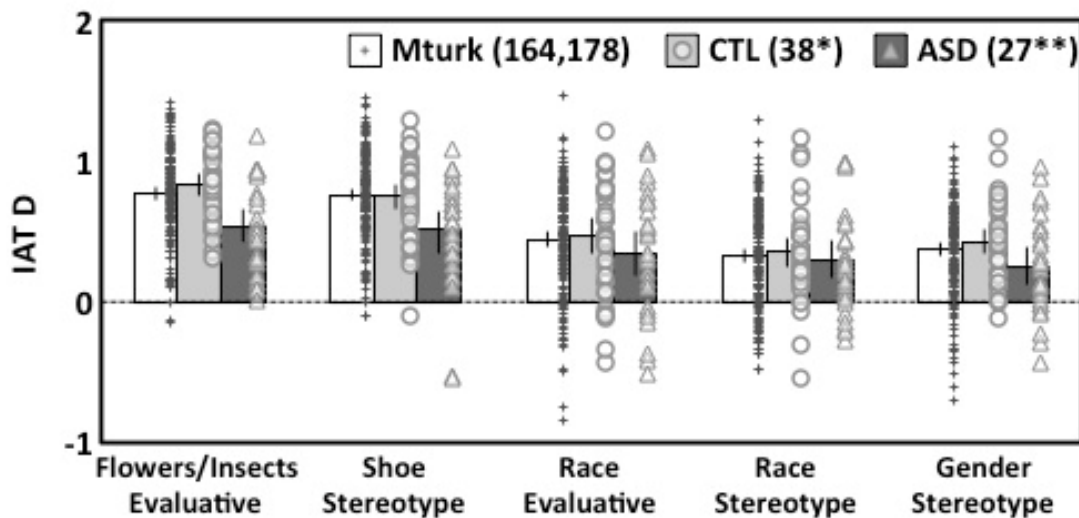

Supplemental Figure 3. Mean RT difference (incongruent – congruent blocks) and RT Variance (standard deviation) for practice (B1) and test (B2) blocks of the IAT. Error bars represent 95% confidence intervals.

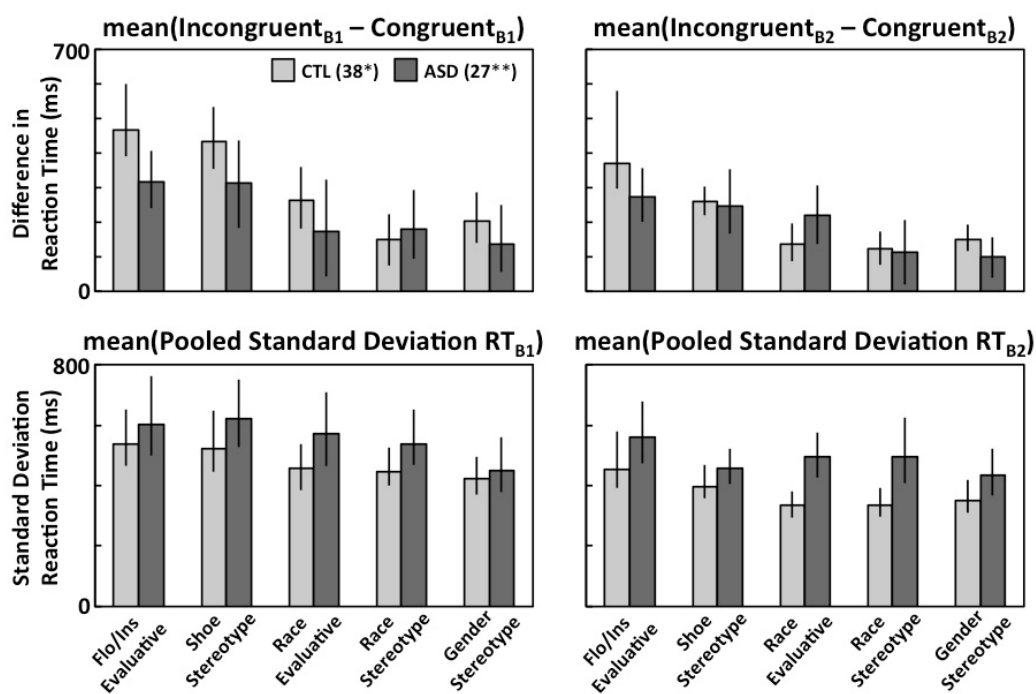

Supplemental Figure 4. Mean RT and standard deviations for Congruent and Incongruent block, averaged over practice (B1) and test blocks (B2). Error bars represent 95% confidence intervals.

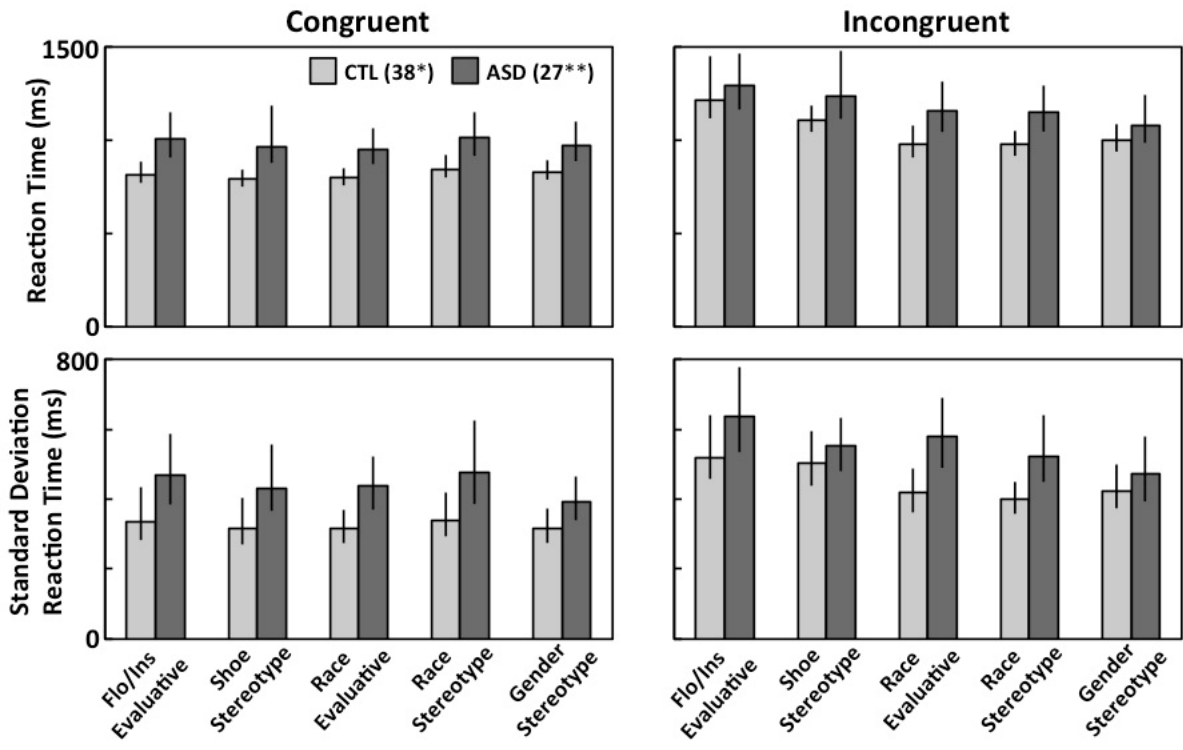

Supplement: NIHMS702487-supplement-01.pdf [file NIHMS702487-supplement-01.pdf]
